# Supplementary material for: A comparative global phosphoproteomics analysis of obinutuzumab (GA101) versus rituximab (RTX) against RTX sensitive and resistant Burkitt lymphoma (BL) demonstrates differential phosphorylation of signaling pathway proteins after treatment
Source: PubMed Central journal article supplement (PMC5768372; doi:10.18632/oncotarget.23040), 2017-12-09
Supplement: oncotarget-08-113895-s001.pdf [file oncotarget-08-113895-s001.pdf]

## A comparative global phosphoproteomics analysis of obinutuzumab (GA101) versus rituximab (RTX) against RTX sensitive and resistant Burkitt lymphoma (BL) demonstrates differential phosphorylation of signaling pathway proteins after treatment

### SUPPLEMENTARY MATERIALS

#### Cell death assay

Raji and Raji4RH cell lines were seeded in 96 well plates at  $10^6$ /ml, with obinutuzumab (100  $\mu$ g/ml), RTX (100 $\mu$ g/ml) or human polyclonal IgG (isotype control) with or without silencing of PLC gamma 2 and incubated at 37°C with 5% CO<sub>2</sub> for 24 hours. Cells were washed, re-suspended in 10% RPMI and stained with annexin V-PE /7-Aminoactinomycin D (7-AAD) to detect loss of plasma membrane integrity and with CD19-FITC. Cell death was determined by flow cytometry (MACS-quant, Miltenyi Biotec, CA). Cells were evaluated within the lymphocyte

gate; approximately 20,000 events were captured and analyzed for each sample.

Immunohistochemistry: Raji and Raji 4RH cells were seeded in Lab tak chamber slide (Nalge Nunc, Roskilde, Denmark) with obinutuzumab or RTX 100 $\mu$ g/ml for 24 hrs. Cells were washed with PBS and blocked with serum for 1 hrs at room temperature. Incubate with primary antibody (P-PLCG2) 1hr at room temperature and rinsed with PBS-Tween-20. Cells were further incubated with secondary antibody conjugated with alexa-488 (Life technology, Waltham, MA. USA) for 1 hr and mount with mounting medium (Vector Laboratory, Burlingame, CA. USA).

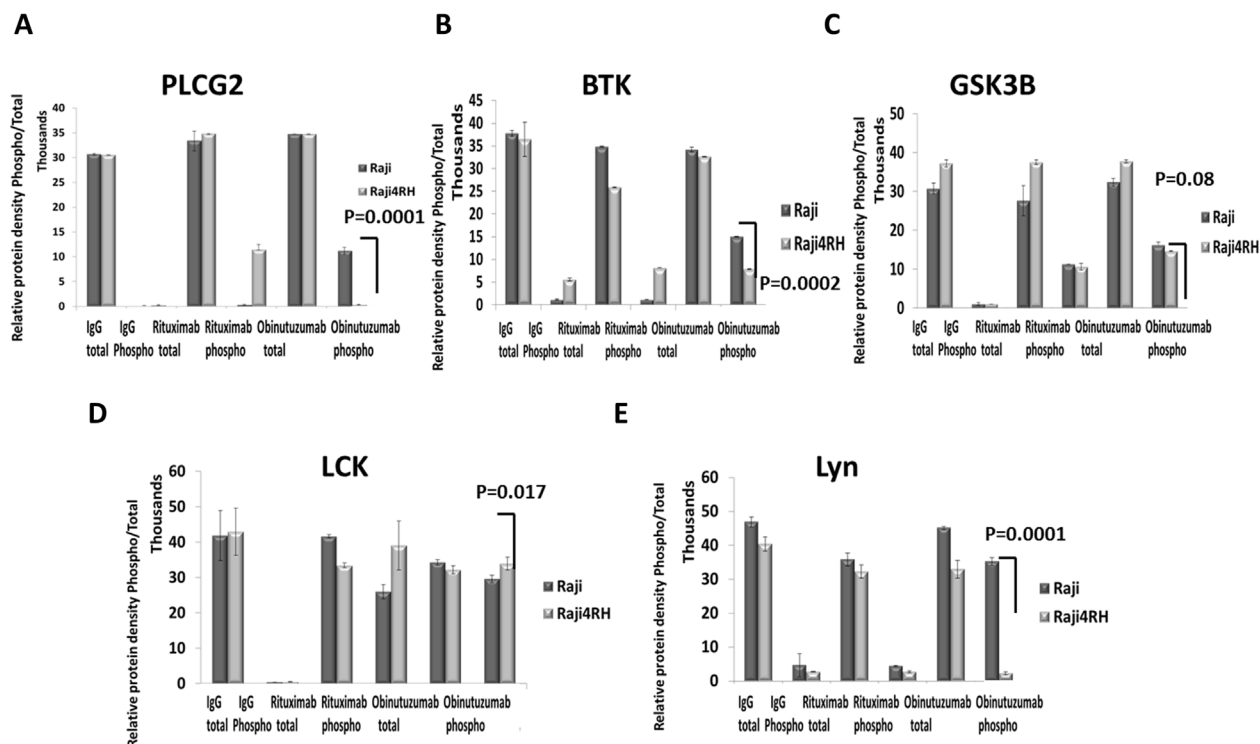

**Supplementary Figure 1: Phosphorylation of proteins involved in BCR signaling pathway are differentially altered after obinutuzumab (Obit) vs. rituximab (RTX).** Phosphorylation of proteins involved in BCR signaling pathways were (A) PLCG2, ( $p=0.001$ ), (B) BTK ( $p=0.002$ ), (C) GSK3B ( $p=NS$ ), (D) LCK, ( $p=0.017$ ) and (E) Lyn, ( $p=0.00001$ ) in Raji and Raji4RH BL cell lines. Obinutuzumab vs. rituximab treated cells were lysed and subjected to SDS polyacrylamide gel electrophoresis. Relative protein density was quantified by Image J software. Data are represented as the mean  $\pm$  SD ( $N=3$ ).

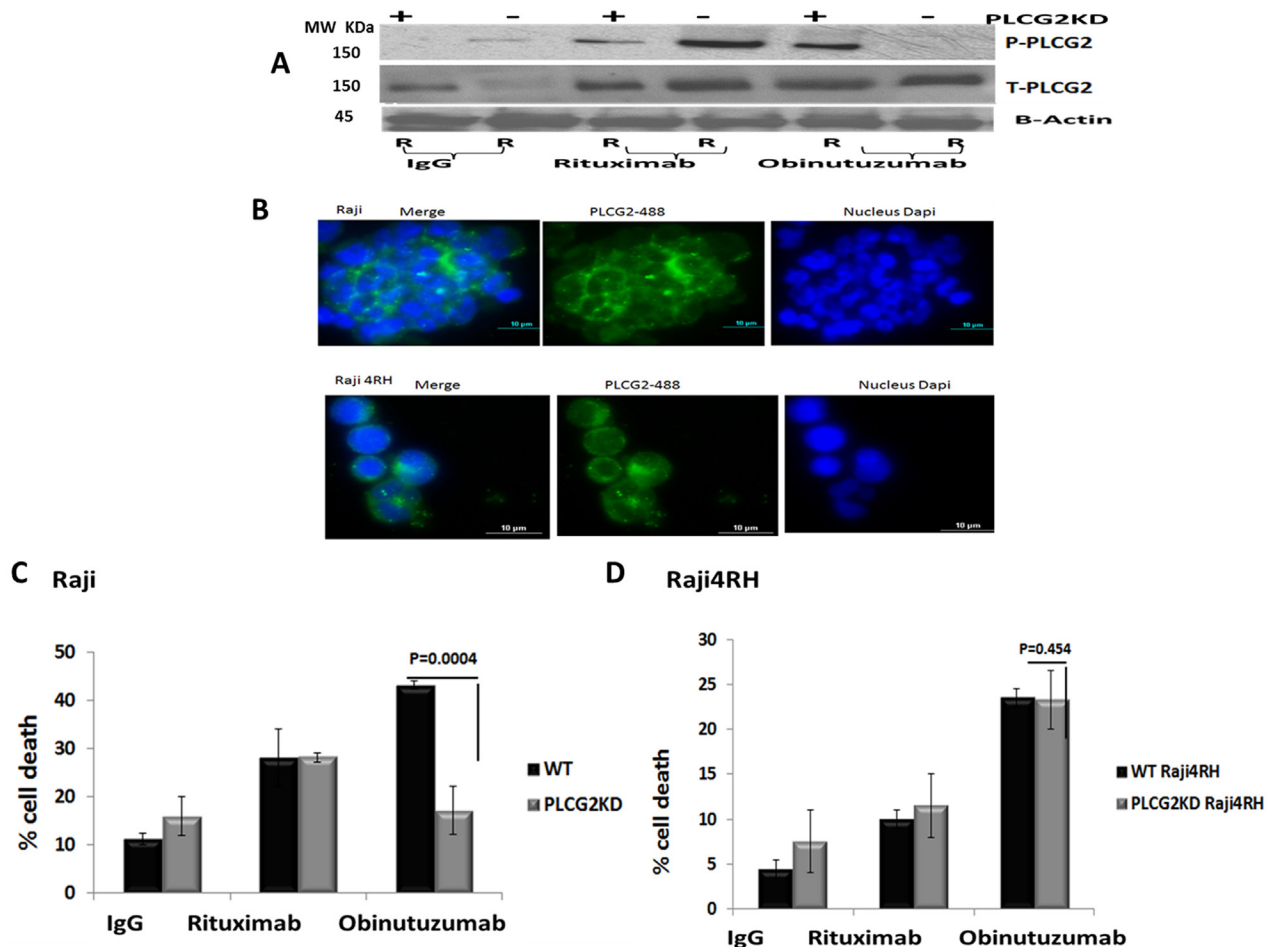

**Supplementary Figure 2:** PLCG2 Expression after obinutuzumab (Obit) vs. rituximab (RTX) in Raji vs. Raji4RH: **(A)** PLCG2 expression in Raji vs. Raji4RH by western blot. **(B)** obinutuzumab treated cells were stained with p-PLCG2-488 Alexa antibody and image by Nikon Eclipse 90i (Melville, NY, USA). **(C)** Raji and **(D)** Raji4RH cells were treated with MAPK1 inhibitor or untreated and further incubated with obinutuzumab or rituximab for direct cell death. Percentage of cell death was analyzed by Annexin V /7AAD staining (P=0.0004 and P=0.45, respectively). Data were shown in mean ±SD. (N=3).
